# Supplementary material for: Patterns of Bird–Bacteria Associations
Source: Springer Nature journal article supplement (doi:10.1007/s10393-018-1342-5), 2018-06-12
Supplement: MOESM2 [file 15839318]

## Sheet: Appendix Table 2
Appendix Table 2. Bird-Bacteria Relationships Patterns of bird-bacteria associations and public health implications Deanna M. Chung, Elise Ferree, Dawn M. Simon, Pamela J. Yeh
Patterns of Bird-Bacteria Associations
Deanna M. Chung, Elise Ferree, Dawn M. Simon, Pamela J. Yeh
	Bacteria Phyla	Actinobacteria	Actinobacteria	Actinobacteria	Actinobacteria	Actinobacteria	Actinobacteria	Actinobacteria	Actinobacteria	Actinobacteria	Actinobacteria	Actinobacteria	Actinobacteria	Actinobacteria	Actinobacteria	Actinobacteria	Actinobacteria	Actinobacteria	Actinobacteria	Actinobacteria	Actinobacteria	Actinobacteria	Actinobacteria	Actinobacteria	Actinobacteria	Actinobacteria	Actinobacteria	Actinobacteria	Actinobacteria	Actinobacteria	Actinobacteria	Actinobacteria	Actinobacteria	Actinobacteria	Actinobacteria	Actinobacteria	Actinobacteria	Actinobacteria	Actinobacteria	Actinobacteria	Actinobacteria	Actinobacteria	Actinobacteria	Actinobacteria	Actinobacteria	Actinobacteria	Actinobacteria	Actinobacteria	Actinobacteria
	Bacteria Family	Actinomycetaceae	Actinomycetaceae	Actinomycetaceae	Actinomycetaceae	Microbacteriaceae	Microbacteriaceae	Actinomycetaceae	Micrococcaceae	Bifidobacteriaceae	Bifidobacteriaceae	Brevibacteriaceae	Brevibacteriaceae	Promicromonosporaceae	Promicromonosporaceae	Promicromonosporaceae	Corynebacteriaceae	Corynebacteriaceae	Corynebacteriaceae	Corynebacteriaceae	Corynebacteriaceae	Corynebacteriaceae	Corynebacteriaceae	Corynebacteriaceae	Corynebacteriaceae	Corynebacteriaceae	Microbacteriaceae	Microbacteriaceae	Desulfovibrionaceae	Enterobacteriaceae	Anaplasmataceae	Anaplasmataceae	Anaplasmataceae	Frankiaceae	Bifidobacteriaceae	Ilumatobacter	Promicromonosporaceae	Intrasporangiaceae	Micrococcaceae	Micrococcaceae	Micrococcaceae	Microbacteriaceae	Microbacteriaceae	Microbacteriaceae	Microbacteriaceae	Microbacteriaceae	Micrococcaceae	Micrococcaceae	Micrococcaceae
Bird Order	Bacteria Genus	Actinomyces	Actinomyces	Actinomyces	Actinomyces	Agrococcus	Agromyces	Arcanobacterium	Arthrobacter	Bifidobacterium	Bifidobacterium	Brevibacterium	Brevibacterium	Cellulosimicrobium	Cellulosimicrobium	Cellulosimicrobium	Corynebacterium	Corynebacterium	Corynebacterium	Corynebacterium	Corynebacterium	Corynebacterium	Corynebacterium	Corynebacterium	Corynebacterium	Corynebacterium	Curtobacterium	Curtobacterium	Desulfovibrio	Edwardsiella	Ehrlichia	Ehrlichia	Ehrlichia	Frankiaceae	Gardnerella	Ilumatobacter	Isoptericola	Janibacter	Kocuria	Kocuria	Kocuria	Microbacterium	Microbacterium	Microbacterium	Microbacterium	Microbacterium	Micrococcus	Micrococcus	Micrococcus
Bird Family	Bacteria Species	Actinomyces canis	Actinomyces naaeslundil	Actinomyces spp.	Actinomyces viscosus	Agroccoccus spp.	Agromyces spp.	Arcanobacterium pyogenes	Arthrobacter spp.	Bifidobacterium longum	Bifidobacterium pseudolongum	Brevibacterium epidermidis	Brevibacterium linens	Cellulosimicrobium funkei	Cellulosimicrobium spp.	Cellulosimimicrobium cellulans	Corynebacterium amycolatum	Corynebacterium diphtheriae	Corynebacterium falsenii	Corynebacterium glutamicum	Corynebacterium jeikeium	Corynebacterium kroppenstedtii	Corynebacterium propinquum	Corynebacterium urealyticum	Corynebacterium xerosis	Corynebacterium spp.	Curtobacterium citreum	Curtobacterium spp.	Desulfovibrio spp.	Edwardsiella tarda	Ehrlichia chaffeensis	Ehrlichia ewingii	Ehrlichia spp.	Frankiaceae spp.	Gardnerella vaginalis	Ilumatobacter spp.	Isoptericola spp.	Janibacter spp.	Kocuria kristinae	Kocuria varians	Kocuria spp.	Microbacterium arborescens	Microbacterium foliorum	Microbacterium maritypicum	Microbacterium testaceum	Microbacterium spp.	Micrococcus luteus	Micrococcaceae spp.	Micrococcus spp.
Accipitriformes
Accipitridae
	Accipiter cooperii
	Accipiter gentilis
	Accipiter nisus
	Accipiter trivirgatus
	Aegypius monachus
	Buteo buteo
	Buteo galapagoensis
	Buteo jamaicensis
	Buteo lagopus
	Buteo magnirostris
	Buteo swainsoni
	Circus pygargus
	Gyps bengalensis
	Gyps coprotheres
	Gyps fulvus
	Haliaeetus albicilla											x													x															x									x
	Haliastur indus
	Hieraaetus fasciatus
	Hieraaetus pennatus
	Milvus migrans
	Milvus milvus
	Neophron percnopterus
Pandionidae
	Pandion haliaetus
Anseriformes
Anatidae
	Aix galericulata
	Aix sponsa
	Anas acuta
	Anas clypeata
	Anas crecca
	Anas formosa
	Anas penelope
	Anas platyrhynchos													x												x
	Anas poecilorhyncha
	Anas strepera
	Anas superciliosa
	Anatidae spp.
	Anser anser
	Anser erythropus
	Aythya ferina
	Aythya fuligula
	Aythya marila
	Branta bernicla
	Branta canadensis
	Branta leucopsis
	Bucephala albeola
	Bucephala clangula
	Cairina moschata
	Chen caerulescens
	Chen rossii
	Chenonetta jubata
	Chloephaga melanoptera
	Cygnus atratus
	Cygnus buccinator
	Cygnus melancoryphus
	Cygnus olor
	Cygnus spp.
	Dendrocygna eytoni
	Melanitta nigra
	Melanitta perspicillata
	Mergus serrator
	Oxyura jamaicensis
	Oxyura leucocephala
	Somateria mollissima
	Tadorna tadorna
Anseranatidae
	Anseranas semipalmata
Anseriformes
	Anseriformes spp.
Apodiformes
Trochilidae
	Amazilia fimbriata
	Eupetomena macroura
Bucerotiformes
Upupidae
	Upupa epops
Caprimulgiformes
Caprimulgidae
	Caprimulgus europaeus
Casuariiformes
	Casuariiformes spp.
Dromaiidae
	Dromaius novaehollandiae
Cathartiformes
Cathartidae
	Cathartes aura
	Coragyps atratus
Charadriiformes
Alcidae
	Alca torda
	Cepphus columba
	Cepphus grylle
	Cerorhinca monocerata
	Fratercula arctica
	Fratercula cirrhata
	Fratercula spp.
	Uria aalge
	Uria lomvia
Charadriidae
	Charadriiformes spp.
	Charadrius dubius
	Charadrius hiaticula
	Pluvialis squatarola
	Vanellus vanellus
Chionididae
	Chionis alba																													x
Hematopodidae
	Haematopus ostralegus
Laridae
	Canada gull
	Chroicocephalus (Larus) ridibundus
	Laridae spp.
	Larus argentatus
	Larus canus
	Larus crassirostris
	Larus delawarensis
	Larus dominicanus																													x
	Larus fuscus
	Larus glaucescens
	Larus hyperboreus
	Larus marinus
	Larus michahellis (cachinnans)
	Larus occidentalis
	Leucophaeus (larus) atricilla
	Leucophaeus (larus) modestus
	Leucophaeus (larus) pipixcan
	Rissa brevirostris
	Rissa spp.
	Rissa tridactyla
Recurvirostridae
	Himantopus himantopus														x											x											x									x
Scolopacidae
	Actitis hypoleucos
	Arenaria interpres																									x										x										x
	Calidris alba
	Calidris alpina
	Calidris canutus
	Calidris ferruginea
	Calidris minuta
	Calidris ptilocnemis
	Calidris pusilla
	Calidris temminckii
	Gallinago gallinago
	Limicola falcinellus
	Limosa lapponica
	Limosa limosa					x	x																			x											x	x								x			x
	Lymnocryptes minimus
	Philomachus pugnax
	Scolopacidae spp.
	Scolopax rusticola
	Tringa glareola
	Tringa nebularia
	Tringa ochropus
	Tringa totanus																																													x
Stercorariidae
	Stercorarius antarcticus																													x
	Stercorarius maccormicki																													x
Sternidae
	Onychoprion (Sterna) fuscatus
	Sterna hirundo
	Thalasseus maxima
Ciconiiformes
Ardeidae
	Ardea herodias
Ciconiidae
	Ciconia ciconia																																		x
	Ciconiidae spp.
Coliiformes
Coliidae
	Urocolius macrourus
Columbiformes
Columbidae
	Columba livia
	Columba palumbus
	Columbidae
	Columbidae spp.
	Columbina (Scardafella) squammata
	Columbina minuta
	Columbina passerina
	Streptopelia (roseogrisea) risoria
	Streptopelia decaocto
	Zenaida asiatica
	Zenaida macroura
Coraciiformes
Alcedinidae
	Halcyon (Todiramphus) cinnamominus
Cerylidae
	Ceryle alcyon
	Chloroceryle americana
Halcyonidae
	Dacelo novaeguineae
Cuculiformes
Cuculidae
	Clamator glandarius
	Cuculus canorus
Falconiformes
Accipitridae
	Spizaetus philippensis
Falconidae
	Falco berigora
	Falco cherrug																																x
	Falco naumanni
	Falco pelegrinoides
	Falco peregrinus
	Falco rusticolus
	Falco sparverius
	Falco tinnunculus
	Falconidae spp.
	Milvago chimango
Galliformes
Numididae
	Acryllium vulturinum
	Numida meleagris
	Numididae spp.
Odontophoridae
	Colinus virginianus																																												x
Phasianidae
	Alectoris chukar
	Alectoris rufa
	Centrocercus minimus
	Coturnix coturnix
	Coturnix spp.
	Galliformes spp.
	Gallus gallus							x			x															x
	Lophura swinhoii
	Meleagris gallopavo																									x					x	x	x														x		x
	Pavo cristatus
	Perdix perdix
	Phaisanus colchicus
	Phasianidae spp.
	Phasianus colchicus																														x
	Tympanuchus cupido
Gaviiformes
Gaviidae
	Gavia (arctica) pacifica
	Gavia immer
Gruiformes
Aramidae
	Aramus guarauna
Gruidae
	Grus americana			x																						x			x
	Grus canadensis																									x
	Grus grus
Gruiformes
	Gruiformes spp.
Rallidae
	Fulica americana
	Fulica atra
	Gallinula chloropus
	Porphyrio (mantelli) hochstetteri
	Porphyrio porphyrio melanotus
	Porzana carolina
	Porzana porzana
	Rallidae spp.
	Rallus aquaticus
Otidiformes
Otididae
	Ardeotis kori																																																x
	Chlamydotis undulata																																																x
	Eupodotis senegalensis																																																x
	Otis tarda																																								x
	Tetrax tetrax
Passeriformes
Acanthizidae
	Acanthiza pusilla
	Sericornis frontalis
Acrocephalidae
	Acrocephalus palustris
	Acrocephalus schoenobaenus
	Acrocephalus scirpaceus
	Hippolais icterina
Aegithalidae
	Aegithalos caudatus
	Psaltriparus minimus
Alaudidae
	Alauda arvensis
	Alauda gulgula
Artamidae
	Gymnorhina (Cracticus) tibicen
Bombycillidae
	Bombycilla garrulus
Cardinalidae
	Cardinalis cardinalis
	Cyanocompsa brissonii
	Passerina ciris
	Passerina cyanea
	Pheucticus ludovicianu
	Pheucticus melanocephalus
	Piranga ludoviciana
	Piranga olivacea
Certhiidae
	Certhia americana
	Certhia familiaris
Cettiidae
	Cettia cetti
Conopophagidae
	Conopophaga lineata
Corvidae
	Aphelocoma coerulescens
	Aphelocoma spp.
	Corvus brachyrhynchos
	Corvus cornix
	Corvus frugilegus
	Corvus macrorhynchos		x		x
	Corvus monedula
	Corvus spp.
	Cyanocitta cristata
	Cyanocitta stelleri
	Garrulus glandarius
	Pica pica
Emberezidae
	Arremon flavirostris
Emberizidae
	Coryphospingus pileatus
	Emberiza chrysophrys
	Emberiza cia
	Emberiza citrinella
	Emberiza hortulana
	Emberiza schoeniclus
	Emberiza tristrami
	Junco hyemalis
	Melospiza georgiana
	Melospiza lincolnii
	Melospiza melodia
	Melozone crissalis
	Passerculus sandwichensis
	Passerella iliaca
	Pipilo erythrophthalmus
	Pipilo spp.
	Spizella arborea
	Spizella passerina
	Spizella pusilla
	Zonotrichia albicollis
	Zonotrichia atricapilla
	Zonotrichia capensis
	Zonotrichia leucophrys
Estrildidae
	Erythrura gouldiae
	Neochmia temporalis
	Taeniopygia guttata
Fringillidae
	Acanthis flammea
	Carduelis cannabina
	Carduelis carduelis
	Carduelis chloris
	Carpodacus erythrinus
	Carpodacus purpureus
	Chloris chloris
	Coccothraustes coccothraustes
	Fringilla coelebs
	Fringilla montefringilla
	Fringillidae spp.
	Haemorhous mexicanus
	Leucosticte tephrocotis
	Linaria flavirostris
	Loxia curvirostra
	Pyrrhula pyrrhula
	Serinus canaria																									x
	Serinus serinus
	Spinus pinus
	Spinus psaltria
	Spinus spinus
	Spinus spp.
	Spinus tristis
Furnariidae
	Furnarius rufus
	Hylocryptus rectirostris
	Lepidocolaptes angustirostris
Hirundinidae
	Delichon urbicum
	Hirundo rustica
	Petrochelidon pyrrhonota
Icteridae
	Agelaius phoeniceus
	Gnorimopsar chopi
	Icterus galbula
	Molothrus ater
	Molothrus spp
	Quiscalus major
	Quiscalus quiscula
	Xanthocephalus xanthocephalus
Laniidae
	Lanius collurio
	Lanius excubitor
	Lanius senator
Locustellidae
	Locustella luscinioides
	Locustella naevia
Maluridae
	Malurus cyaneus
Meliphagidae
	Acanthagenys rufogularis
	Lichenostomus chrysops
	Lichenostomus fuscus
	Lichenostomus penicillattus
	Manorina melanophrys
	Melithreptus brevirostris
	Philemon corniculatus
	Phylidonyris novaehollandiae
Menuridae
	Menura novaehollandiae
Mimidae
	Dumetella carolinensis
	Mimus polyglottos
	Toxostoma rufum
Monarchidae
	Grallina cyanoleuca
Motacillidae
	Anthus pratensis
	Anthus trivialis
	Motacilla alba
	Motacilla cinerea
	Motacilla flava
Muscicapidae
	Erithacus rubecula
	Ficedula albicollis
	Ficedula hypoleuca
	Ficedula parva
	Luscinia luscinia
	Luscinia megarhynchos
	Luscinia svecica
	Muscicapa striata
	Oenanthe oenanthe
	Phoenicurus ochruros
	Phoenicurus phoenicurus
	Saxicola rubetra
Not classifed
Icteria virens	Icteria virens
Pardalotidae
	Sericornis frontalis
Paridae
	Baeolophus bicolor
	Baeolophus inornatus
	Baeolophus spp.
	Cyanistes caeruleus
	Parus ater
	Parus caeruleus
	Parus major
	Periparus ater
	Poecile atricapillus
	Poecile carolinensis
	Poecile montanus
Parulidae
	Basileuterus flaveolus
	Basileuterus hypoleucus
	Basileuterus leucophrys
	Dendrocopos major
	Setophaga (Dendroica) petechia
	Dendroica pinus
	Geothlypis aequinoctialis
	Geothlypis trichas
	Helmitheros vermivorum
	Myiothlypis (Basileuterus) flaveola
	Oporornis formosus
	Oporornis philadelphia
	Oreothlypis (Vermivora) celata
	Parkesia (Seiurus) noveboracensis
	Parulidae spp.
	Protonotaria citrea
	Seiurus aurocapilla
	Setophaga (Dendroica) coronata
	Setophaga (Dendroica) magnolia
	Setophaga (Dendroica) nigrescens
	Setophaga (Dendroica) pensylvanica
	Setophaga (Dendroica) petechia
	Vermivora peregrina
	Wilsonia citrina
Passeriformes
Passeridae
	Passer domesticus
	Passer hispaniolensis
	Passer montanus
	Passeridae spp.
	Passeriformes spp.
Petroicidae
	Eopsaltria australis
Phylloscopidae
	Phylloscopus collybita
	Phylloscopus fuscatus
	Phylloscopus proregulus
	Phylloscopus sibilatrix
	Phylloscopus trochilus
Pipridae
	Antilophia galeata
	Chiroxiphia pareola
	Neopelma pallescens
Ploceidae
	Ploceus capensis
	Ploceus castaneiceps
Polioptilidae
	Polioptila dumicola
Prunellidae
	Prunella collaris
	Prunella modularis
Ptilonorhynchidae
	Ptilonorhynchus violaceus
Regulidae
	Regulus regulus
Rhipiduridae
	Rhipidura fuliginosa
Sittidae
	Sitta carolinensis
	Sitta europaea
Sturnidae
	Sturnus vulgaris
Sylviidae
	Sylvia atricapilla
	Sylvia borin
	Sylvia communis
	Sylvia curruca
	Sylvia melanocephala
	Sylvia nisoria
Thamnophilidae
	Thamnophilus caerulescens
	Thamnophilus pelzelni
Thraupidae
	Coereba flaveola
	Ramphocelus carbo
	Saltator maximus
	Saltator similis
	Schistochlamys melanopis
	Tachyphonus rufus
	Tangara cayana
	Thlypopsis sordida
	Thraupis palmarum
	Volatinia jacarina
Troglodytidae
	Cantorchilus leucotis
	Thryomanes bewickii
	Thryothorus ludovicianus
	Troglodytes aedon
	Troglodytes musculus
	Troglodytes troglodytes
Turdidae
	Catharus fuscescens
	Catharus guttatus
	Catharus minimus
	Catharus spp.
	Catharus ustulatus
	Hylocichla mustelina
	Sialia mexicana
	Sialia sialis
	Turdus amaurochalinus
	Turdus hortulorum
	Turdus iliacus
	Turdus leucomelas
	Turdus merula
	Turdus migratorius
	Turdus nudigenis
	Turdus olivater
	Turdus pallidus
	Turdus philomelos
	Turdus pilaris
	Turdus rufiventris
	Turdus torquatus
	Turdus viscivorus
	Zoothera (dauma) aurea
	Zoothera sibirica
Tyrannidae
	Arundinicola leucocephala
	Casiornis rufus
	Contopus sordidulus
	Elaenia chiriquensi
	Elaenia cristata
	Elaenia mesoleuca
	Elaenia obscura
	Empidonax difficilis
	Empidonax minimus
	Empidonax virescens
	Hemitriccus margaritaceiventer
	Myiarchus tyrannulus
	Myiopagis viridicata
	Myiophobus fasciatus
	Pitangus sulphuratus
	Platyrinchus mystaceus
	Pseudocolopteryx flaviventris
	Tyrannus melancholicus
	Tyrannus tyrannus
Vireonidae
	Cyclarhis gujanensis
	Vireo cassinii
	Vireo gilvus
	Vireo olivaceus
Pelecaniformes
Anhingidae
	Anhinga anhinga
Ardeidae
	Ardea alba
	Ardea herodias
	Ardeidae
	Ardeidae spp.
	Botaurus lentiginosus
	Botaurus stellaris
	Bubulcus ibis
	Butorides virescens
	Egretta alba
	Egretta garzetta
	Egretta intermedia
	Egretta thula
	Egretta tricolor
	Nycticorax nycticorax
Pelecanidae
	Pelecanidae spp.
	Pelecanus conspicillatus
	Pelecanus erythrorhynchos
	pelecanus occidentalis
	Pelecanus onocrotalus
	Pelecanus thagus
Threskiornithidae
	Nipponia nippon
	Platalea leucorodia
	Plegadis falcinellus
	Threskiornis aethiopicus
	Threskiornis moluccus
Phoenicopteriformes
Phoenicopteridae
	Phoeniconaias minor																									x				x
	Phoenicopteridae spp.
	Phoenicopterus (ruber) roseus																																														x
Piciformes
Picidae
	Dendrocopos major
	Picidae spp.
	Picoides pubescens
	Picumnus albosquamatus
	Picus viridis
Ramphastidae
	Ramphastos toco
Podicipediformes
Podicipedidae
	Aechmophorus occidentalis
	Podiceps nigricollis
	Podicipedidae spp.
	Podilymbus podiceps
Procellariiformes
Diomedeidae
	Diomedea chlororhynchos
	Diomedea chrysostoma
	Diomedea melanophris
Hydrobatidae
	Oceanites oceanicus
Procellariidae
	Calonectris edwardsii
	Fulmarus glacialis
	Macronectes giganteus																													x
	Margarops fuscatus																																	x														x
	Puffinus gravis
	Puffinus pacificus
	Puffinus tenuirostris
Psittaciformes
Cacatuidae
	Cacatua galerita
	Cacatua moluccensis
	Cacatua spp.
	Nymphicus hollandicus																									x																x		x	x
Loriidae
	Psittaculidae spp.
	Lorius spp.
Nestoridae
	Nestor meridionalis
Psittacidae
	Alipiopsitta xanthops
	Amazona aestiva
	Amazona amazonica
	Amazona auropalliata
	Amazona autumnalis
	Amazona farinosa								x	x	x																x																x
	Amazona pretrei
	Amazona rhodocorytha
	Amazona vinacea
	Anodorhynchus hyacinthinus
	Anodorhynchus hyacinthinus
	Ara ararauna																					x					x
	Ara chloroptera																					x
	Ara spp.
	Aratinga spp.
	Poicephalus senegalus
	Primolius auricollis
	psittacus erithacus																									x		x																x
Psittaculidae
	Agapornis spp.
	Alisterus scapularis
	Cyanoramphus novaezelandiae
	Eclectus roratus
	Eos spp.
	Melopsittacus undulatus																			x						x		x																	x				x
	Psephotus haematonotus
	Psittacula derbiana			x
	Psittacula krameri
	Trichoglossus haematodus
	Trichoglossus spp.
Strigopidae
	Strigops habroptilus
Rheiformes
Rheidae
	Pterocnemia pennata																	x
Sphenisciformes
Spheniscidae
	Aptenodytes patagonicus
	Eudyptes chrysolophus
	Eudyptula minor
	Pygoscelis adeliae																													x
	Pygoscelis antarctica																													x
	Pygoscelis papua																													x
	Spheniscus demersus
	Spheniscus humboldti	x											x			x	x		x		x		x	x															x
	Spheniscus magellanicus
	Sphenisciformes spp.
Strigiformes
Strigidae
	Aegolius funereus
	Asio flammeus
	Asio otus
	Athene noctua
	Bubo bubo
	Bubo scandiaca
	Bubo virginianus
	Fratercula arctica
	Megascops (Otus) kennicottii
	Otus asio
	Strix aluco
	Strix occidentalis
	Strix varia
Tytonidae
	Tyto alba
Struthioniformes
Struthionidae
	Struthio camelus
Suliformes
Phalacrocoracidae
	Phalacrocorax atriceps
	Phalacrocorax auritus
	Phalacrocorax carbo
	Phalacrocorax harrisi
	Phalacrocorax magellanicus
	Phalacrocorax spp.
	Phalacrocorax urile
Sulidae
	Morus (Sula) bassanus
	Sula dactylatra
	Sula leucogaster
	Sula sula
	Sula variegata
Tinamiformes
Tinamidae
	Crypturellus parvirostris
[truncated: 434 more columns]
