# Supplementary material for: Patterns of Bird–Bacteria Associations
Source: Springer Nature journal article supplement (doi:10.1007/s10393-018-1342-5), 2018-06-12
Supplement: MOESM3 [file 15839318]

## Sheet: Appendix Table 3
Appendix Table 3. Resistant bacteria and antibiotics by geographic region and habitat
Patterns of Bird-Bacteria Associations
Deanna M. Chung, Elise Ferree, Dawn M. Simon, Pamela J. Yeh
Category	Bacteria	Antibiotics that bacteria has been shown to be resistant to	Total number of resistant antibiotics	Total # of resistant antibiotics in "category"
Temperate	Escherichia coli	Amikacin, Amoxicillin, Amoxicillin-clavulanic acid, Ampicillin, Apramycin, Aztreonam, Bacitracin, Carbenicillin, Cefadroxil, Cefazolin, Cefepime, Cefixime, Cefotaxime, Cefotetan, Cefoxitin, Cefpodoxime, Cefquinome, Ceftazidime, Ceftiofur, Ceftizoxime, Ceftriaxone, Cefuroxime, Cephalothin, Chloramphenicol, Chlortetracycline, Ciprofloxacin, Clindamycin, Colistin, Danofloxacin, Difloxacin, Dihydrost…	80	105
	Salmonella enterica	Amoxicillin, Amoxicillin-clavulanic acid, Ampicillin, Aztreonam, Bacitracin, Carbadox, Cefazolin, Cefotaxime, Cefoxitin, Ceftazidime, Ceftiofur, Ceftriaxone, Cephalexin, Cephalothin, Chloramphenicol, Clindamycin, Doxycycline, Erythromycin, Florfenicol, Gentamicin, Kanamycin, Lincomycin, Nalidixic acid, Neomycin, Novobiocin, Oxacillin, Oxytetracycline, Penicillin, Penicillin G, Piperacillin, Rifam…	40
	Pasteurella multocida	Amikacin, Amoxicillin-clavulanic acid, Ampicillin, Apramycin, Bacitracin, Cefixime, Cefoperazone, Ceftiofur, Cephalothin, Chloramphenicol, Ciprofloxacin, Colistin, Difloxacin, Doxycycline, Enrofloxacin, Florfenicol, Flumequine, Gentamicin, Kanamycin, Nalidixic acid, Neomycin, Nitrofurantoin, Norfloxacin, Ofloxacin, Orbifloxacin, Oxolinic acid, Oxytetracycline, Penicillin, Spectinomycin, Streptomy…	38
	Riemerella anatipestifer	Amikacin, Amoxicillin-clavulanic acid, Ampicillin, Azithromycin, Aztreonam, Cefaclor, Cefazolin, Cefepime, Cefoperazone, Cefotaxime, Ceftazidime, Ceftriaxone, Cefuroxime, Ciprofloxacin, Clindamycin, Doxycycline, Erythromycin, Furazolidone, Gentamicin, Imipenem, Kanamycin, Nalidixic acid, Neomycin, Netilmicin, Nitrofurantoin, Norfloxacin, Ofloxacin, Oxacillin, Penicillin, Penicillin G, Piperacilli…	37
	Campylobacter jejuni	Amoxicillin, Ampicillin, Azithromycin, Cephalothin, Chloramphenicol, Chlortetracycline, Ciprofloxacin, Clindamycin, Dihydrostreptomycin, Doxycycline, Enrofloxacin, Erythromycin, Florfenicol, Gentamicin, Kanamycin, Macrolides, Metronidazole, Nalidixic acid, Neomycin, Norfloxacin, Oxytetracycline, Quinulone, Streptomycin, Sulfonamides, Telithromycin, Tetracycline, Tilmicosin, Trimethoprim, Vancomyc…	29
	Staphylococcus aureus	Amikacin, Amoxicillin, Amoxicillin-clavulanic acid, Ampicillin, Cefoperazone, Cephalexin, Chloramphenicol, Ciprofloxacin, Clindamycin, Cloxacillin, Doxycycline, Enrofloxacin, Erythromycin, Gentamicin, Kanamycin, Marbofloxacin, Norfloxacin, Oxacillin, Oxytetracycline, Penicillin, Rifampicin, Spectinomycin, Sulfamethoxazole-trimethoprim, Tetracycline, Tiamulin, Tilmicosin, Tobramycin, Tylosin, Vanc…	29
	Enterococcus faecalis	Amikacin, Amoxicillin-clavulanic acid, Ampicillin, Cefoxitin, Ceftiofur, Cephalothin, Ciprofloxacin, Clindamycin, Doxycycline, Enrofloxacin, Erythromycin, Fosfomycin, Gentamicin, Imipenem, Linezolid, Moxifloxacin, Neomycin, Novobiocin, Oxacillin, Quinupristin-dalfopristin, Rifampicin, Streptomycin, Sulfathiazole, Sulphadimethoxine, Tetracycline, Tylosin, Vancomycin	27
	Enterococcus faecium	Ampicillin, Bacitracin, Ciprofloxacin, Clindamycin, Doxycycline, Enrofloxacin, Erythromycin, Flavomycin, Fosfomycin, Gentamicin, Imipenem, Kanamycin, Linezolid, Mezlocillin, Moxifloxacin, Nitrofurantoin, Penicillin, Quinupristin-dalfopristin, Rifampicin, Streptomycin, Teicoplanin, Tetracycline, Tylosin, Vancomycin, Virginiamycin	25
	Pseudomonas aeruginosa	Amoxicillin, Amoxicillin-clavulanic acid, Ampicillin, Ceftiofur, Cephalothin, Chloramphenicol, Clindamycin, Enrofloxacin, Erythromycin, Florfenicol, Nalidixic acid, Novobiocin, Penicillin, Spectinomycin, Streptomycin, Sulfadiazine-trimethoprim, Sulfamethoxazole-trimethoprim, Sulfathiazole, Sulfisoxazole, Sulphadimethoxine, Tetracycline, Tylosin	22
	Campylobacter coli	Amoxicillin, Ampicillin, Azithromycin, Ciprofloxacin, Clindamycin, Erythromycin, Gentamicin, Kanamycin, Macrolides, Nalidixic acid, Norfloxacin, Quinulone, Streptomycin, Sulfonamides, Tetracycline, Vancomycin	16
	Enterococcus cecorum	Chloramphenicol, Colistin, Doxycycline, Enrofloxacin, Erythromycin, Florfenicol, Gentamicin, Kanamycin, Lincomycin, Linezolid, Neomycin, Oxytetracycline, Quinupristin-dalfopristin, Streptomycin, Tetracycline, Tylosin	16
	Enterococcus gallinarum	Amikacin, Cefazolin, Cefoxitin, Ceftiofur, Cephalothin, Chloramphenicol, Enrofloxacin, Erythromycin, Gentamicin, Imipenem, Spectinomycin, Sulfadimethoxine, Tetracycline, Ticarcillin, Ticarcillin-clavulanate, Vancomycin	16
	Proteus mirabilis	Amoxicillin-clavulanic acid, Ampicillin, Bacitracin, Carbenicillin, Cefoperazone, Ceftiofur, Cephalothin, Chloramphenicol, Gentamicin, Piperacillin, Tetracycline, Ticarcillin, Tobramycin, Trimethoprim, Vancomycin	15
	Enterococcus raffinosus	Chloramphenicol, Ciprofloxacin, Doxycycline, Enrofloxacin, Erythromycin, Fosfomycin, Gentamicin, Imipenem, Linezolid, Mezlocillin, Quinupristin-dalfopristin, Rifampicin, Streptomycin, Tylosin	14
	Streptococcus gallolyticus	Amoxicillin, Ceftiofur, Clindamycin, Enrofloxacin, Gentamicin, Neomycin, Oxytetracycline, Spectinomycin, Streptomycin, Sulfadimethoxine, Sulfamethoxazole-trimethoprim, Tetracycline	12
	Aeromonas hydrophila	Amoxicillin-clavulanic acid, Ampicillin, Carbenicillin, Cefotaxime, Cephalothin, Ciprofloxacin, Doxycycline, Enrofloxacin, Flumequine, Marbofloxacin, Oxytetracycline	11
	Enterobacter cloacae	Amikacin, Amoxicillin-clavulanic acid, Ampicillin, Cefazolin, Cefoxitin, Ceftiofur, Cephalothin, Clindamycin, Penicillin, Tetracycline, Ticarcillin	11
	Ornithobacterium rhinotracheale	Amikacin, Amoxicillin, Colistin, Enrofloxacin, Erythromycin, Flumequine, Gentamicin, Kanamycin, Neomycin, Streptomycin	10
	Enterobacter sakazakii	Amoxicillin-clavulanic acid, Ampicillin, Cefadroxil, Ciprofloxacin, Doxycycline, Enrofloxacin, Gentamicin, Norfloxacin, Oxytetracycline	9
	Klebsiella pneumoniae	Ampicillin, Carbenicillin, Cefoxitin, Erythromycin, Kanamycin, Nalidixic acid, Streptomycin, Ticarcillin	8
	Ochrobactrum anthropi	Amoxicillin-clavulanic acid, Cefadroxil, Cephalexin, Enrofloxacin, Marbofloxacin, Norfloxacin, Oxytetracycline, Rifampicin	8
	Proteus penneri	Ampicillin, Carbenicillin, Cephalothin, Chloramphenicol, Piperacillin, Sulfadiazine-trimethoprim, Tetracycline, Ticarcillin	8
	Proteus vulgaris	Amoxicillin-clavulanic acid, Ampicillin, Carbenicillin, Ceftiofur, Cephalothin, Piperacillin, Tetracycline, Ticarcillin	8
	Riemerella columbina	Bacitracin, Colistin, Gentamicin, Neomycin, Spectinomycin, Streptomycin, Sulfamethoxazole-trimethoprim, Sulfonamides	8
	Burkholderia cepacia	Amoxicillin-clavulanic acid, Ampicillin, Carbenicillin, Ceftazidime, Cephalothin, Tetracycline, Ticarcillin	7
	Clostridium perfringens	Bacitracin, Chlortetracycline, Lincomycin, Oxytetracycline, Teicoplanin, Tetracycline, Virginiamycin	7
	Pseudomonas luteola	Amoxicillin-clavulanic acid, Danofloxacin, Doxycycline, Enrofloxacin, Marbofloxacin, Oxytetracycline, Rifampicin	7
	Pseudomonas oryzihabitans	Amoxicillin-clavulanic acid, Cephalexin, Doxycycline, Enrofloxacin, Gentamicin, Marbofloxacin, Rifampicin	7
	Enterobacter agglomerans	Amoxicillin-clavulanic acid, Ciprofloxacin, Doxycycline, Enrofloxacin, Nitrofurantoin, Oxytetracycline	6
	Serratia fonticola	Ampicillin, Cefazolin, Cefuroxime, Cephalothin, Kanamycin, Ticarcillin	6
	Serratia odorifera	Ciprofloxacin, Doxycycline, Enrofloxacin, Marbofloxacin, Norfloxacin, Oxytetracycline	6
	Staphylococcus gallinarum	Clindamycin, Erythromycin, Novobiocin, Oxytetracycline, Spectinomycin, Tetracycline	6
	Enterobacter amigenus	Cefoxitin, Ceftiofur, Clindamycin, Doxycycline, Penicillin	5
	Enterobacter asburiae	Ampicillin, Cefazolin, Cefoxitin, Clindamycin, Penicillin	5
	Helicobacter pullorum	Ampicillin, Ciprofloxacin, Erythromycin, Nalidixic acid, Tetracycline	5
	Morganella morganii	Amoxicillin-clavulanic acid, Ampicillin, Ampicillin-sulbactam, Cefuroxime, Cephalothin	5
	Neisseria flavescens	Clindamycin, Erythromycin, Novobiocin, Penicillin, Tylosin	5
	Neisseria sicca	Clindamycin, Erythromycin, Novobiocin, Penicillin, Tylosin	5
	Serratia liquefaciens	Ampicillin, Cefazolin, Cefoxitin, Cefuroxime, Doxycycline	5
	Bordetella avium	Amoxicillin, Colistin, Sulfamethoxazole-trimethoprim, Tetracycline	4
	Enterobacter aerogenes	Ampicillin, Clindamycin, Penicillin, Ticarcillin	4
	Hafnia alvei	Amoxicillin-clavulanic acid, Cefazolin, Cefuroxime, Cephalothin	4
	Klebsiella oxytoca	Ampicillin, Carbenicillin, Erythromycin, Ticarcillin	4
	Pantoea agglomerans	Amoxicillin-clavulanic acid, Ampicillin, Carbenicillin, Cephalothin	4
	Rahnella aquatilis	Ampicillin, Cefazolin, Cefuroxime, Ticarcillin	4
	Shewanella algae	Amoxicillin-clavulanic acid, Ampicillin, Carbenicillin, Cephalothin	4
	Staphylococcus lentus	Clindamycin, Erythromycin, Oxacillin, Penicillin	4
	Stenotrophomonas (Pseudomonas) maltophilia	Amoxicillin-clavulanic acid, Kanamycin, Oxytetracycline, Rifampicin	4
	Acinetobacter baumannii	Ceftiofur, Cephalothin, Chloramphenicol	3
	Aeromonas spp.	Ampicillin, Carbenicillin, Cephalothin	3
	Brachyspira alvinipulli	Amoxicillin, Erythromycin, Tetracycline	3
	Brachyspira hyodysenteriae	Amoxicillin, Erythromycin, Tetracycline	3
	Campylobacter lari	Ampicillin, Kanamycin, Nalidixic acid	3
	Enterobacter cancerogenus	Amoxicillin-clavulanic acid, Ampicillin, Cephalothin	3
	Enterococcus durans	Erythromycin, Gentamicin, Tetracycline	3
	Escherichia hermannii	Amoxicillin-clavulanic acid, Ampicillin, Cephalothin	3
	Klebsiella ornithinolytica	Amoxicillin-clavulanic acid, Ciprofloxacin, Enrofloxacin	3
	Plesiomonas shigelloides	Ampicillin, Carbenicillin, Ticarcillin	3
	Serratia marcescens	Ampicillin, Ampicillin-sulbactam, Cefuroxime	3
	Acinetobacter iwoffii	Cloxacillin, Oxytetracycline	2
	Alcaligenes faecalis	Ampicillin, Chloramphenicol	2
	Citrobacter gillenii	Kanamycin, Ticarcillin	2
	Citrobacter koseri	Cefotaxime, Cefoxitin	2
	Enterococcus avium	Ampicillin, Vancomycin	2
	Klebsiella ozaenae	Ampicillin, Chloramphenicol	2
	Leclercia adecarboxylata	Ampicillin, Cephalothin	2
	Listeria innocua	Clindamycin, Imipenem	2
	Listeria monocytogenes	Doxycycline, Tetracycline	2
	Mycoplasma synoviae	Erythromycin, Flumequine	2
	Raoultella ornithinolytica	Ampicillin, Ticarcillin	2
	Vibrio alginolytics	Ampicillin, Carbenicillin	2
	Citrobacter freundii	Amoxicillin-clavulanic acid	1
	Enterococcus casseliflavus	Gentamicin	1
	Enterococcus hirae	Tetracycline	1
	Erysipelothrix rhusiopathiae	Penicillin	1
	Helicobacter anseris	Cephalothin	1
	Providencia rettgeri	Tylosin	1
	Serratia proteamaculans	Ceftiofur	1
	Staphylococcus saprophyticus	Vancomycin	1
	Staphylococcus succinus	Vancomycin	1
	Vibrio cholerae	Ampicillin	1
Tropical	Escherichia coli	Amoxicillin, Amoxicillin-clavulanic acid, Ampicillin, Aztreonam, Cefadroxil, Cefotiam, Cefpodoxime, Ceftriaxone, Chloramphenicol, Ciprofloxacin, Erythromycin, Fosfomycin, Kanamycin, Nalidixic acid, Nitrofurantoin, Norfloxacin, Penicillin, Quinulone, Streptomycin, Sulfamethoxazole, Sulfamethoxazole-trimethoprim, Tetracycline, Ticarcillin, Tilmicosin	24	54
	Salmonella enterica	Amoxicillin, Ampicillin, Azithromycin, Aztreonam, Cefotaxime, Cefoxitin, Cefpodoxime, Ceftriaxone, Cefuroxime, Chloramphenicol, Ciprofloxacin, Colistin, Enrofloxacin, Flumequine, Lincomycin, Nalidixic acid, Ofloxacin, Oxacillin, Oxytetracycline, Streptomycin, Sulfamethoxazole, Sulfamethoxazole-trimethoprim, Sulfonamides, Tetracycline	24
	Riemerella anatipestifer	Amoxicillin, Ampicillin, Bacitracin, Cephalothin, Chloramphenicol, Colistin, Doxycycline, Enrofloxacin, Erythromycin, Flumequine, Gentamicin, Novobiocin, Oxytetracycline, Penicillin, Tetracycline, Trimethoprim	16
	Avibacterium paragallinarum	Amoxicillin, Ampicillin, Ceftiofur, Cloxacillin, Doxycycline, Enrofloxacin, Erythromycin, Gentamicin, Lincomycin, Neomycin, Oxytetracycline, Penicillin, Spectinomycin, Sulfamethoxazole-trimethoprim	14
	Proteus vulgaris	Amoxicillin, Ampicillin, Cefaclor, Chloramphenicol, Ciprofloxacin, Enrofloxacin, Gentamicin, Lincomycin, Neomycin, Oxacillin, Oxytetracycline, Piperacillin	12
	Shigella dysenteriae	Amoxicillin, Ampicillin, Cefaclor, Chloramphenicol, Ciprofloxacin, Gentamicin, Lincomycin, Neomycin, Oxacillin, Oxytetracycline, Piperacillin	11
	Enterococcus faecium	Amoxicillin, Ampicillin, Cephalothin, Clindamycin, Doxycycline, Erythromycin, Penicillin G, Streptomycin, Sulfamethoxazole-trimethoprim, Vancomycin	10
	Enterococcus durans	Amoxicillin, Ampicillin, Cephalothin, Clindamycin, Erythromycin, Gentamicin, Penicillin G, Streptomycin, Vancomycin	9
	Campylobacter jejuni	Ampicillin, Cefadroxil, Cefotiam, Ceftriaxone, Ciprofloxacin, Erythromycin, Nalidixic acid, Tetracycline	8
	Enterococcus faecalis	Amoxicillin, Ampicillin, Cephalothin, Clindamycin, Erythromycin, Penicillin G, Streptomycin, Vancomycin	8
	Enterobacter cloacae	Ampicillin, Cefotaxime, Cefpodoxime, Kanamycin, Streptomycin, Tetracycline	6
	Shigella boydii	Amoxicillin, Cefadroxil, Cefotiam, Ceftriaxone, Penicillin, Tetracycline	6
	Shigella flexneri	Amoxicillin, Cefadroxil, Cefotiam, Ceftriaxone, Penicillin, Tetracycline	6
	Enterococcus gallinarum	Gentamicin, Streptomycin, Vancomycin	3
	Streptococcus equinus	Gentamicin, Streptomycin, Vancomycin	3
	Serratia marcescens	Cephalothin	1
Agricultural	Riemerella anatipestifer	Amikacin, Amoxicillin-clavulanic acid, Ampicillin, Azithromycin, Aztreonam, Cefaclor, Cefazolin, Cefepime, Cefoperazone, Cefotaxime, Ceftazidime, Ceftriaxone, Cefuroxime, Ciprofloxacin, Clindamycin, Doxycycline, Erythromycin, Furazolidone, Gentamicin, Imipenem, Kanamycin, Nalidixic acid, Neomycin, Netilmicin, Nitrofurantoin, Norfloxacin, Ofloxacin, Oxacillin, Penicillin, Penicillin G, Piperacilli…	37	42
	Salmonella enterica	Amoxicillin, Ampicillin, Cephalexin, Cephalothin, Clindamycin, Doxycycline, Erythromycin, Lincomycin, Oxytetracycline, Penicillin G, Piperacillin, Streptomycin, Sulfamethoxazole-trimethoprim, Tetracycline	14
Natural	Escherichia coli	Amoxicillin-clavulanic acid, Ampicillin, Aztreonam, Carbenicillin, Cefadroxil, Ceftiofur, Cephalothin, Chloramphenicol, Ciprofloxacin, Gentamicin, Kanamycin, Mecillinam, Nalidixic acid, Piperacillin, Streptomycin, Sulfamethoxazole-trimethoprim, Tetracycline, Ticarcillin, Tigecycline, Tobramycin, Trimethoprim	21	41
	Proteus mirabilis	Amoxicillin-clavulanic acid, Ampicillin, Carbenicillin, Ceftiofur, Cephalothin, Chloramphenicol, Gentamicin, Piperacillin, Tetracycline, Ticarcillin, Tobramycin	11
	Enterobacter cloacae	Amikacin, Amoxicillin-clavulanic acid, Ampicillin, Cefazolin, Cefoxitin, Cephalothin, Clindamycin, Penicillin, Ticarcillin	9
	Pasteurella multocida	Ampicillin, Ceftiofur, Cephalothin, Enrofloxacin, Florfenicol, Gentamicin, Streptomycin, Tetracycline, Tiamulin	9
	Proteus penneri	Ampicillin, Carbenicillin, Cephalothin, Chloramphenicol, Piperacillin, Sulfadiazine-trimethoprim, Tetracycline, Ticarcillin	8
	Proteus vulgaris	Amoxicillin-clavulanic acid, Ampicillin, Carbenicillin, Ceftiofur, Cephalothin, Piperacillin, Tetracycline, Ticarcillin	8
	Burkholderia cepacia	Amoxicillin-clavulanic acid, Ampicillin, Carbenicillin, Ceftazidime, Cephalothin, Tetracycline, Ticarcillin	7
	Campylobacter jejuni	Amoxicillin, Ciprofloxacin, Doxycycline, Metronidazole, Nalidixic acid, Tetracycline	6
	Enterobacter asburiae	Ampicillin, Cefazolin, Cefoxitin, Clindamycin, Penicillin	5
	Pseudomonas aeruginosa	Amoxicillin-clavulanic acid, Ampicillin, Cephalothin, Chloramphenicol, Tetracycline	5
	Salmonella enterica	Ampicillin, Streptomycin, Sulfamethoxazole-trimethoprim, Sulfonamides, Tetracycline	5
	Serratia liquefaciens	Ampicillin, Cefazolin, Cefoxitin, Cefuroxime, Doxycycline	5
	Aeromonas hydrophila	Amoxicillin-clavulanic acid, Ampicillin, Carbenicillin, Cephalothin	4
	Enterobacter aerogenes	Ampicillin, Clindamycin, Penicillin, Ticarcillin	4
	Enterobacter amigenus	Cefoxitin, Clindamycin, Doxycycline, Penicillin	4
	Rahnella aquatilis	Ampicillin, Cefazolin, Cefuroxime, Ticarcillin	4
	Serratia fonticola	Ampicillin, Cefazolin, Cefuroxime, Ticarcillin	4
	Shewanella algae	Amoxicillin-clavulanic acid, Ampicillin, Carbenicillin, Cephalothin	4
	Enterobacter cancerogenus	Amoxicillin-clavulanic acid, Ampicillin, Cephalothin	3
	Escherichia hermannii	Amoxicillin-clavulanic acid, Ampicillin, Cephalothin	3
	Hafnia alvei	Amoxicillin-clavulanic acid, Cefazolin, Cephalothin	3
	Klebsiella oxytoca	Ampicillin, Carbenicillin, Ticarcillin	3
	Klebsiella pneumoniae	Ampicillin, Carbenicillin, Ticarcillin	3
	Plesiomonas shigelloides	Ampicillin, Carbenicillin, Ticarcillin	3
	Alcaligenes faecalis	Ampicillin, Chloramphenicol	2
	Campylobacter coli	Ciprofloxacin, Tetracycline	2
	Citrobacter gillenii	Kanamycin, Ticarcillin	2
	Citrobacter koseri	Cefotaxime, Cefoxitin	2
	Enterococcus avium	Ampicillin, Vancomycin	2
	Morganella morganii	Amoxicillin-clavulanic acid, Cephalothin	2
	Pantoea agglomerans	Carbenicillin, Cephalothin	2
	Raoultella ornithinolytica	Ampicillin, Ticarcillin	2
	Serratia marcescens	Ampicillin, Cephalothin	2
	Vibrio alginolytics	Ampicillin, Carbenicillin	2
	Citrobacter freundii	Amoxicillin-clavulanic acid	1
	Enterococcus gallinarum	Vancomycin	1
	Erysipelothrix rhusiopathiae	Penicillin	1
	Staphylococcus saprophyticus	Vancomycin	1
	Staphylococcus succinus	Vancomycin	1
	Vibrio cholerae	Ampicillin	1
Suburban	Escherichia coli	Ampicillin, Cefquinome, Ceftazidime, Ceftiofur, Cefuroxime, Chloramphenicol, Ciprofloxacin, Enrofloxacin, Florfenicol, Meropenem, Nalidixic acid, Neomycin, Piperacillin, Streptomycin, Sulfamethoxazole-trimethoprim, Sulfonamides, Tetracycline	17	26
	Salmonella enterica	Ampicillin, Chloramphenicol, Clindamycin, Erythromycin, Oxacillin, Penicillin, Streptomycin, Sulfisoxazole, Sulfonamides, Tetracycline, Trimethoprim	11
	Enterococcus faecalis	Ampicillin, Erythromycin, Gentamicin, Tetracycline, Vancomycin	5
	Enterococcus faecium	Ampicillin, Erythromycin, Gentamicin, Tetracycline	4
	Enterococcus durans	Erythromycin, Gentamicin, Tetracycline	3
	Morganella morganii	Ampicillin, Ampicillin-sulbactam, Cefuroxime	3
	Serratia marcescens	Ampicillin, Ampicillin-sulbactam, Cefuroxime	3
	Enterococcus casseliflavus	Gentamicin	1
	Enterococcus gallinarum	Vancomycin	1
	Enterococcus hirae	Tetracycline	1
	Hafnia alvei	Cefuroxime	1
Urban	Escherichia coli	Amikacin, Amoxicillin-clavulanic acid, Ampicillin, Ampicillin-sulbactam, Chloramphenicol, Enrofloxacin, Flumequine, Gentamicin, Levofloxacin, Lincospectin, Nalidixic acid, Oxytetracycline, Streptomycin, Sulfamethoxazole-trimethoprim, Sulfonamides, Tetracycline	16	16
Industrial Livestock	Escherichia coli	Amikacin, Amoxicillin, Amoxicillin-clavulanic acid, Ampicillin, Apramycin, Aztreonam, Bacitracin, Cefadroxil, Cefazolin, Cefepime, Cefixime, Cefotaxime, Cefotetan, Cefotiam, Cefoxitin, Cefpodoxime, Ceftazidime, Ceftiofur, Ceftizoxime, Ceftriaxone, Cefuroxime, Cephalexin, Cephalothin, Chloramphenicol, Chlortetracycline, Ciprofloxacin, Clindamycin, Colistin, Danofloxacin, Difloxacin, Dihydrostrepto…	78	104
	Salmonella enterica	Amikacin, Amoxicillin, Amoxicillin-clavulanic acid, Ampicillin, Azithromycin, Aztreonam, Bacitracin, Carbadox, Cefazolin, Cefotaxime, Cefoxitin, Ceftazidime, Ceftiofur, Ceftriaxone, Cefuroxime, Cephalothin, Chloramphenicol, Ciprofloxacin, Colistin, Enrofloxacin, Erythromycin, Florfenicol, Flumequine, Gentamicin, Kanamycin, Lincomycin, Nalidixic acid, Neomycin, Novobiocin, Ofloxacin, Oxacillin, Ox…	42
	Pasteurella multocida	Amikacin, Amoxicillin-clavulanic acid, Ampicillin, Apramycin, Bacitracin, Cefixime, Cefoperazone, Ceftiofur, Cephalothin, Ciprofloxacin, Colistin, Difloxacin, Doxycycline, Enrofloxacin, Florfenicol, Flumequine, Gentamicin, Kanamycin, Nalidixic acid, Neomycin, Nitrofurantoin, Norfloxacin, Ofloxacin, Orbifloxacin, Oxolinic acid, Oxytetracycline, Penicillin, Spectinomycin, Sulfamethoxazole, Sulfamet…	35
	Campylobacter jejuni	Amoxicillin, Ampicillin, Azithromycin, Cefadroxil, Cefotiam, Ceftriaxone, Chloramphenicol, Chlortetracycline, Ciprofloxacin, Clindamycin, Dihydrostreptomycin, Doxycycline, Enrofloxacin, Erythromycin, Gentamicin, Kanamycin, Macrolides, Metronidazole, Nalidixic acid, Neomycin, Norfloxacin, Oxytetracycline, Quinulone, Streptomycin, Sulfonamides, Tetracycline, Tilmicosin, Tobramycin, Trimethoprim, Va…	30
	Enterococcus faecium	Amoxicillin, Ampicillin, Bacitracin, Cephalothin, Ciprofloxacin, Clindamycin, Doxycycline, Enrofloxacin, Erythromycin, Flavomycin, Fosfomycin, Gentamicin, Imipenem, Kanamycin, Linezolid, Mezlocillin, Moxifloxacin, Nitrofurantoin, Penicillin, Penicillin G, Quinupristin-dalfopristin, Rifampicin, Streptomycin, Sulfamethoxazole-trimethoprim, Teicoplanin, Tetracycline, Tylosin, Vancomycin, Virginiamyc…	29
	Staphylococcus aureus	Amikacin, Amoxicillin, Amoxicillin-clavulanic acid, Ampicillin, Cefoperazone, Cephalexin, Chloramphenicol, Ciprofloxacin, Clindamycin, Cloxacillin, Doxycycline, Enrofloxacin, Erythromycin, Gentamicin, Kanamycin, Marbofloxacin, Norfloxacin, Oxacillin, Oxytetracycline, Penicillin, Rifampicin, Spectinomycin, Sulfamethoxazole-trimethoprim, Tetracycline, Tiamulin, Tilmicosin, Tobramycin, Tylosin, Vanc…	29
	Enterococcus faecalis	Amikacin, Amoxicillin, Amoxicillin-clavulanic acid, Ampicillin, Bacitracin, Cefoxitin, Cephalothin, Ciprofloxacin, Clindamycin, Doxycycline, Enrofloxacin, Erythromycin, Fosfomycin, Gentamicin, Imipenem, Linezolid, Moxifloxacin, Oxacillin, Penicillin G, Quinupristin-dalfopristin, Rifampicin, Streptomycin, Tetracycline, Tylosin, Vancomycin	25
	Campylobacter coli	Amoxicillin, Ampicillin, Azithromycin, Ciprofloxacin, Clindamycin, Erythromycin, Gentamicin, Kanamycin, Macrolides, Nalidixic acid, Norfloxacin, Quinulone, Streptomycin, Sulfonamides, Tetracycline, Vancomycin	16
	Enterococcus cecorum	Chloramphenicol, Colistin, Doxycycline, Enrofloxacin, Erythromycin, Florfenicol, Gentamicin, Kanamycin, Lincomycin, Linezolid, Neomycin, Oxytetracycline, Quinupristin-dalfopristin, Streptomycin, Tetracycline, Tylosin	16
	Riemerella anatipestifer	Amoxicillin, Ampicillin, Bacitracin, Cephalothin, Chloramphenicol, Colistin, Doxycycline, Enrofloxacin, Erythromycin, Flumequine, Gentamicin, Novobiocin, Oxytetracycline, Penicillin, Tetracycline, Trimethoprim	16
	Avibacterium paragallinarum	Amoxicillin, Ampicillin, Ceftiofur, Cloxacillin, Doxycycline, Enrofloxacin, Erythromycin, Gentamicin, Lincomycin, Neomycin, Oxytetracycline, Penicillin, Spectinomycin, Sulfamethoxazole-trimethoprim	14
	Enterococcus raffinosus	Chloramphenicol, Ciprofloxacin, Doxycycline, Enrofloxacin, Erythromycin, Fosfomycin, Gentamicin, Imipenem, Linezolid, Mezlocillin, Quinupristin-dalfopristin, Rifampicin, Streptomycin, Tylosin	14
	Proteus vulgaris	Amoxicillin, Ampicillin, Cefaclor, Chloramphenicol, Ciprofloxacin, Enrofloxacin, Gentamicin, Lincomycin, Neomycin, Oxacillin, Oxytetracycline, Piperacillin	12
	Streptococcus gallolyticus	Amoxicillin, Ceftiofur, Clindamycin, Enrofloxacin, Gentamicin, Neomycin, Oxytetracycline, Spectinomycin, Streptomycin, Sulfadimethoxine, Sulfamethoxazole-trimethoprim, Tetracycline	12
	Shigella dysenteriae	Amoxicillin, Ampicillin, Cefaclor, Chloramphenicol, Ciprofloxacin, Gentamicin, Lincomycin, Neomycin, Oxacillin, Oxytetracycline, Piperacillin	11
	Clostridium perfringens	Avilamycin, Bacitracin, Chlortetracycline, Enramycin, Flavomycin, Josamycin, Lincomycin, Oxytetracycline, Tetracycline, Virginiamycin	10
	Ornithobacterium rhinotracheale	Amikacin, Amoxicillin, Colistin, Enrofloxacin, Erythromycin, Flumequine, Gentamicin, Kanamycin, Neomycin, Streptomycin	10
	Enterobacter sakazakii	Amoxicillin-clavulanic acid, Ampicillin, Cefadroxil, Ciprofloxacin, Doxycycline, Enrofloxacin, Gentamicin, Norfloxacin, Oxytetracycline	9
	Enterococcus durans	Amoxicillin, Ampicillin, Cephalothin, Clindamycin, Erythromycin, Gentamicin, Penicillin G, Streptomycin, Vancomycin	9
	Aeromonas hydrophila	Amoxicillin-clavulanic acid, Cefotaxime, Ciprofloxacin, Doxycycline, Enrofloxacin, Flumequine, Marbofloxacin, Oxytetracycline	8
	Ochrobactrum anthropi	Amoxicillin-clavulanic acid, Cefadroxil, Cephalexin, Enrofloxacin, Marbofloxacin, Norfloxacin, Oxytetracycline, Rifampicin	8
	Pseudomonas luteola	Amoxicillin-clavulanic acid, Danofloxacin, Doxycycline, Enrofloxacin, Marbofloxacin, Oxytetracycline, Rifampicin	7
	Pseudomonas oryzihabitans	Amoxicillin-clavulanic acid, Cephalexin, Doxycycline, Enrofloxacin, Gentamicin, Marbofloxacin, Rifampicin	7
	Enterobacter agglomerans	Amoxicillin-clavulanic acid, Ciprofloxacin, Doxycycline, Enrofloxacin, Nitrofurantoin, Oxytetracycline	6
	Serratia odorifera	Ciprofloxacin, Doxycycline, Enrofloxacin, Marbofloxacin, Norfloxacin, Oxytetracycline	6
	Shigella boydii	Amoxicillin, Cefadroxil, Cefotiam, Ceftriaxone, Penicillin, Tetracycline	6
	Shigella flexneri	Amoxicillin, Cefadroxil, Cefotiam, Ceftriaxone, Penicillin, Tetracycline	6
	Helicobacter pullorum	Ampicillin, Ciprofloxacin, Erythromycin, Nalidixic acid, Tetracycline	5
	Klebsiella pneumoniae	Ampicillin, Cefoxitin, Erythromycin, Nalidixic acid, Streptomycin	5
	Bordetella avium	Amoxicillin, Colistin, Sulfamethoxazole-trimethoprim, Tetracycline	4
	Proteus mirabilis	Bacitracin, Cefoperazone, Trimethoprim, Vancomycin	4
	Stenotrophomonas (Pseudomonas) maltophilia	Amoxicillin-clavulanic acid, Kanamycin, Oxytetracycline, Rifampicin	4
	Brachyspira alvinipulli	Amoxicillin, Erythromycin, Tetracycline	3
	Brachyspira hyodysenteriae	Amoxicillin, Erythromycin, Tetracycline	3
	Campylobacter lari	Ampicillin, Kanamycin, Nalidixic acid	3
	Enterococcus gallinarum	Gentamicin, Streptomycin, Vancomycin	3
	Klebsiella ornithinolytica	Amoxicillin-clavulanic acid, Ciprofloxacin, Enrofloxacin	3
	Streptococcus equinus	Gentamicin, Streptomycin, Vancomycin	3
	Acinetobacter iwoffii	Cloxacillin, Oxytetracycline	2
	Klebsiella oxytoca	Ampicillin, Erythromycin	2
	Listeria innocua	Clindamycin, Imipenem	2
	Listeria monocytogenes	Doxycycline, Tetracycline	2
	Mycoplasma synoviae	Erythromycin, Flumequine	2
	Providencia rettgeri	Tylosin	1
